# Supplementary material for: Nanomagnetic macrocyclic Schiff-base–Mn(ii) complex: an efficient heterogeneous catalyst for click approach synthesis of novel β-substitued-1,2,3-triazoles
Source: PubMed Central journal article supplement — RSC Adv. 2022 Jun 16;12(28):17905–18. doi: 10.1039/d2ra02587f (PMC9202600; doi:10.1039/d2ra02587f), 2022-06-16
Supplement: RA-012-D2RA02587F-s001.pdf [file RA-012-D2RA02587F-s001.pdf]

# **Nanomagnetic Macrocyclic Schiff-base-Mn(II) Complex: An Efficient Heterogeneous Catalyst for Click Approach Synthesis of Novel $\beta$ -Substituted-1,2,3-Triazoles**

Saade Abdalkareem Jasim<sup>a</sup>, Yassine Riadi<sup>b,\*</sup>, Hasan Sh. Majdi<sup>c</sup>, Usama S. Altimari<sup>d</sup>

<sup>a</sup> Medical Laboratory Techniques Department, Al-maarif University College, Al-anbar-Ramadi, Iraq.

<sup>b</sup> Department of Pharmaceutics, College of Pharmacy, Prince Sattam Bin Abdulaziz University, Al-kharj, 11942, Saudi Arabia.

<sup>c</sup> Department Chemical Engineering and Petroleum Industries, Al- Mustaqbal University College 51001, Iraq.

<sup>d</sup> Department of Pharmaceutics, Al-Nisour University College, Baghdad, Iraq.

\*correspondence to: Yassine Riadi

Email: [yassine.riadi2022@gmail.com](mailto:yassine.riadi2022@gmail.com) & [y.riadi2@psau.edu.sa](mailto:y.riadi2@psau.edu.sa)

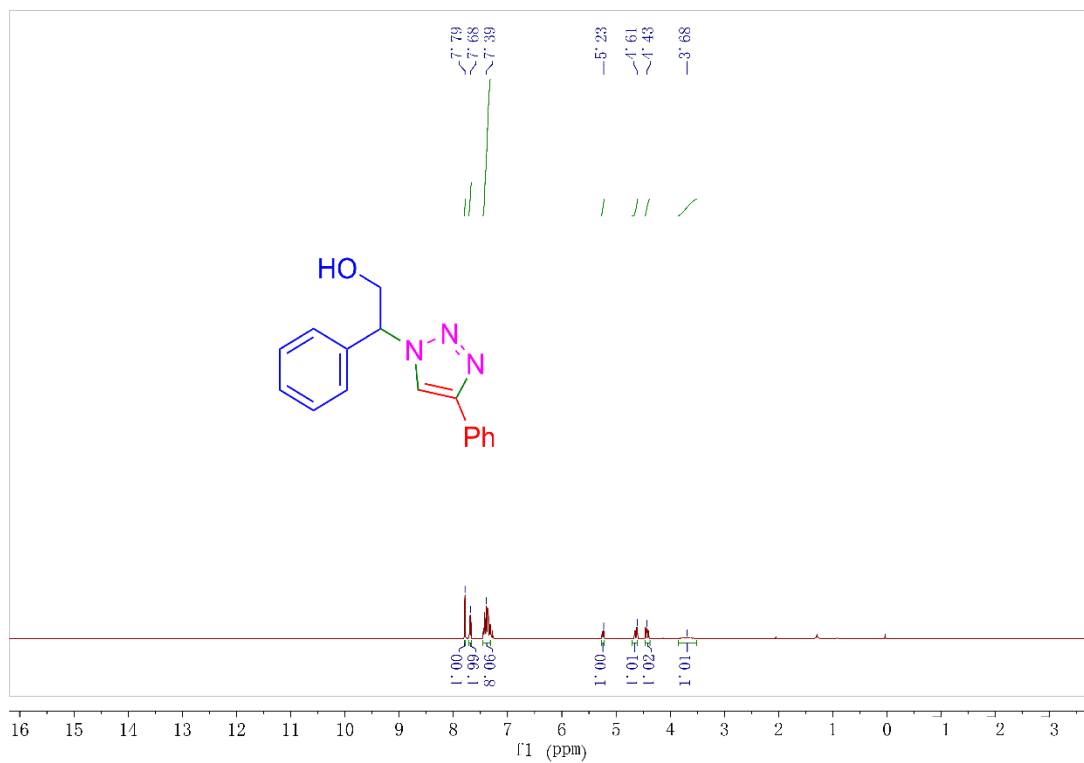

S1. <sup>1</sup>H NMR of 1a.

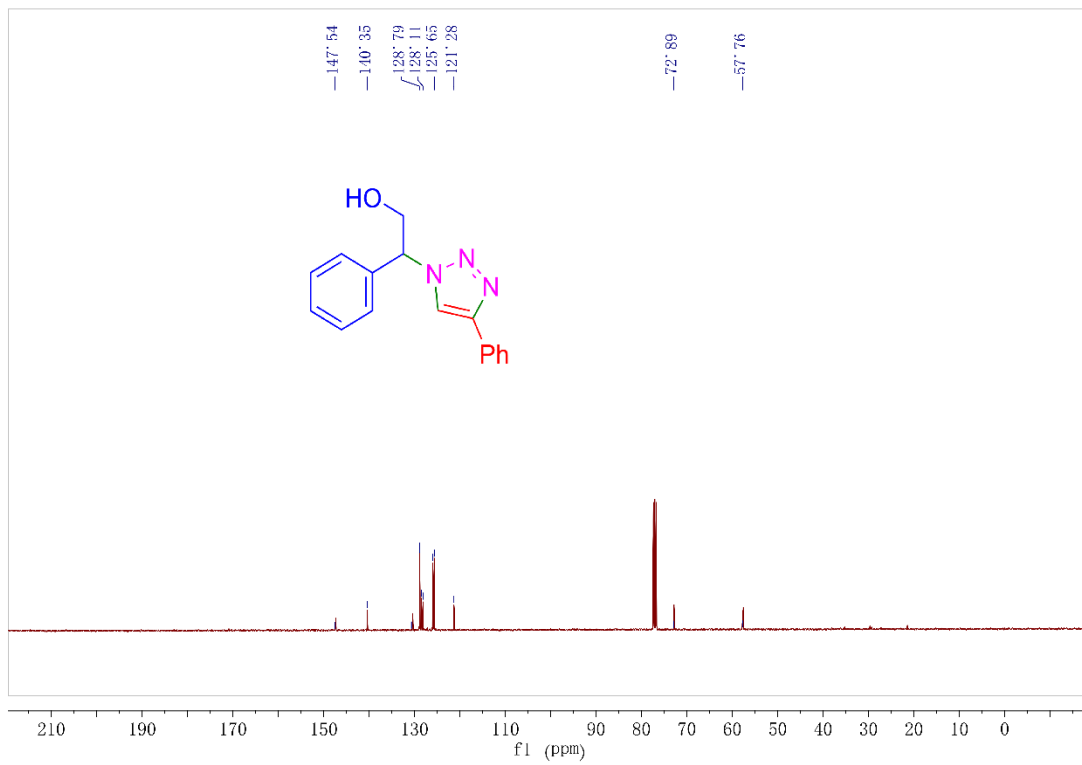

S2. <sup>13</sup>C NMR of 1a.

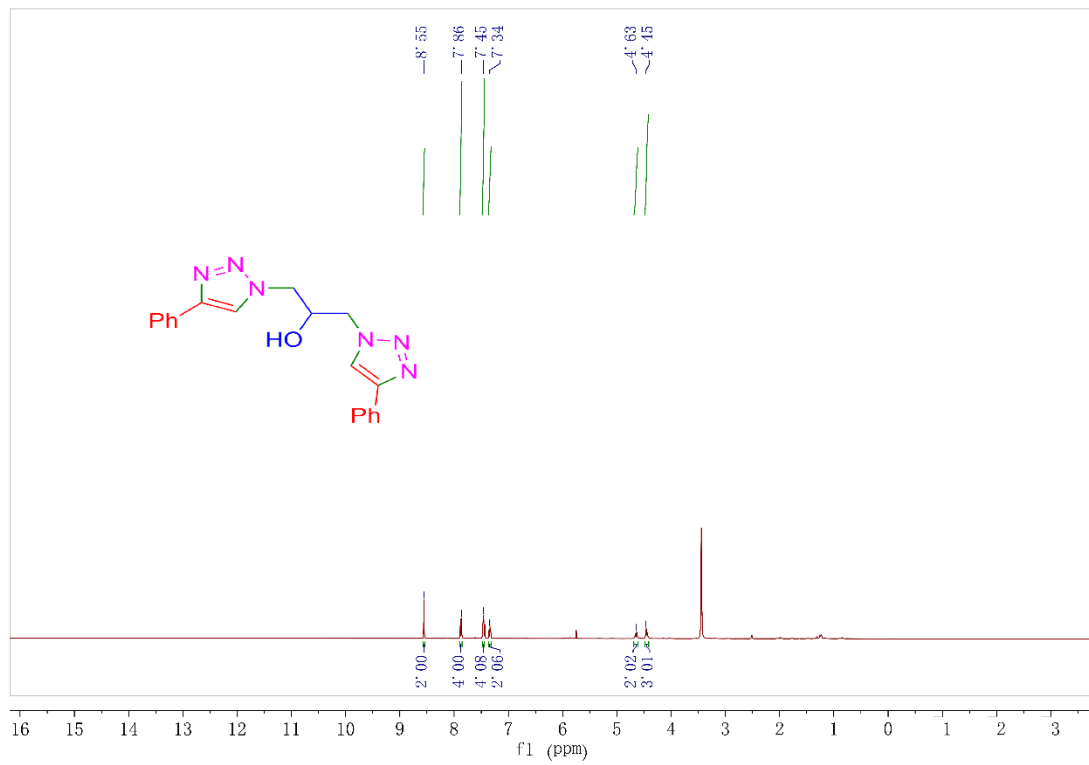

S3.  $^1\text{H}$  NMR of 2a.

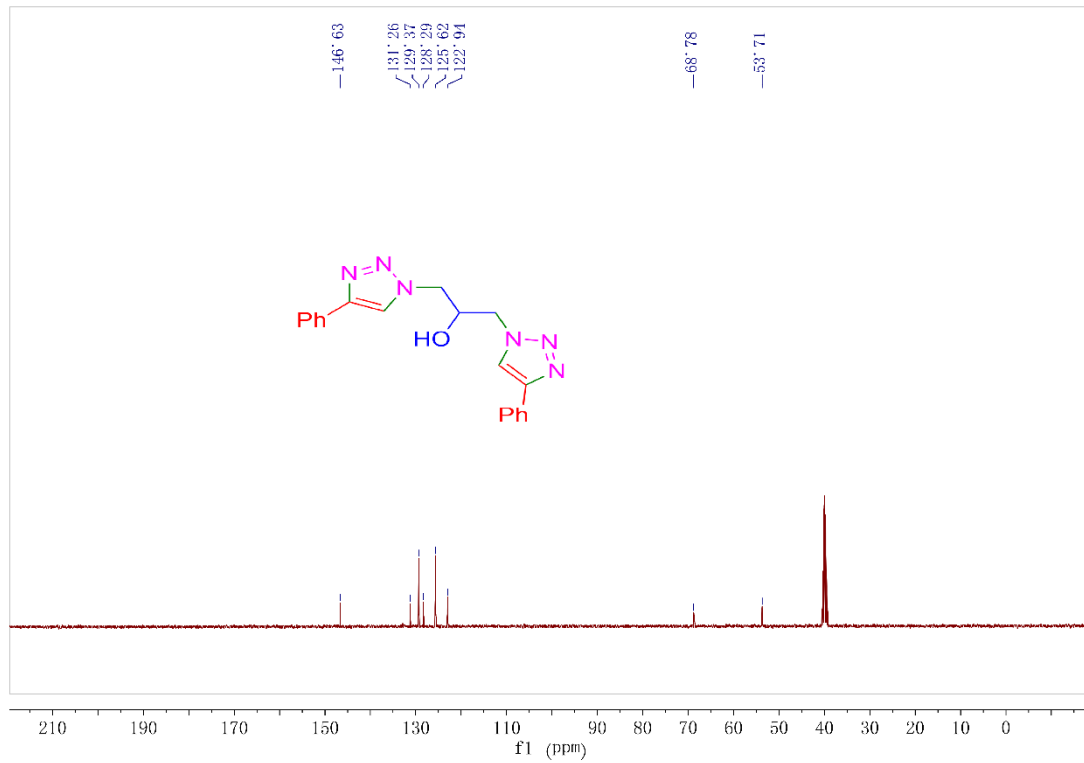

S4.  $^{13}\text{C}$  NMR of 2a.

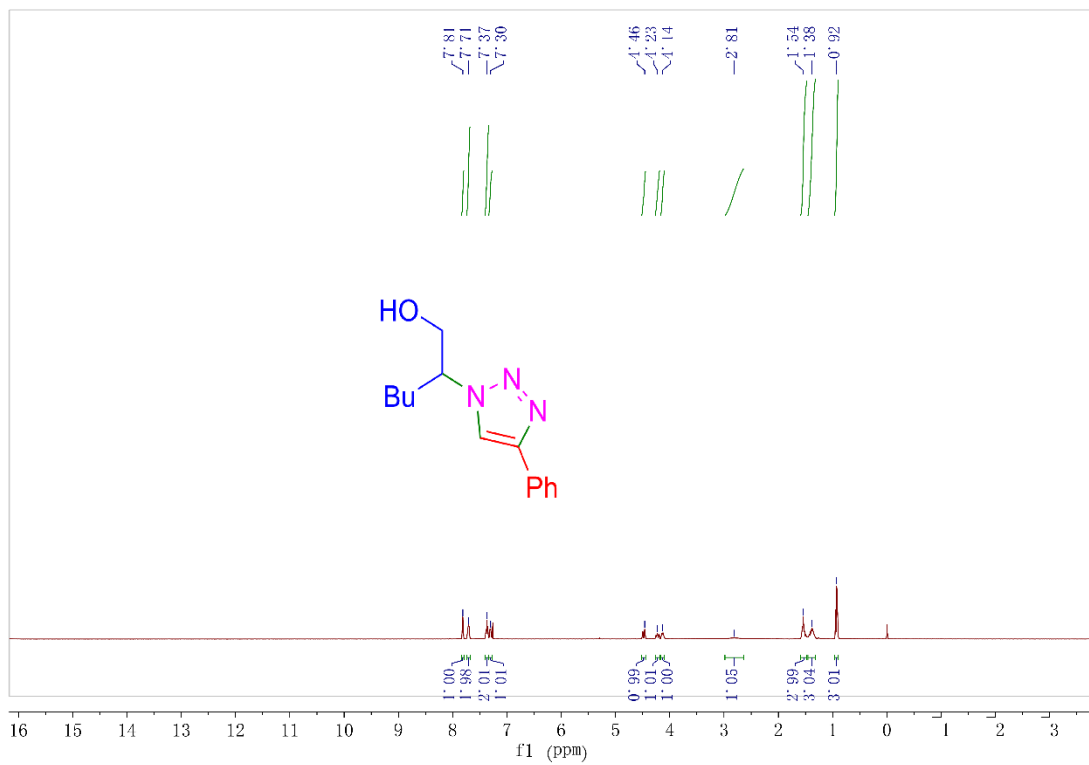

S5. <sup>1</sup>H NMR of 3a.

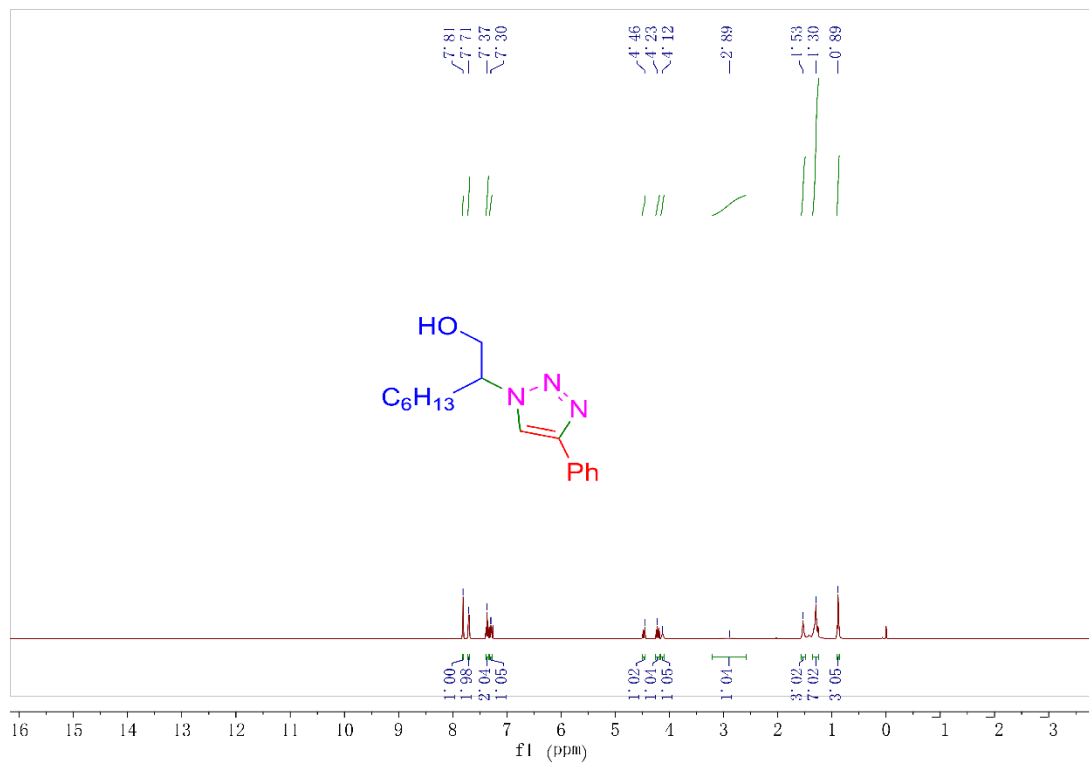

S6.  $^1\text{H}$  NMR of 4a.

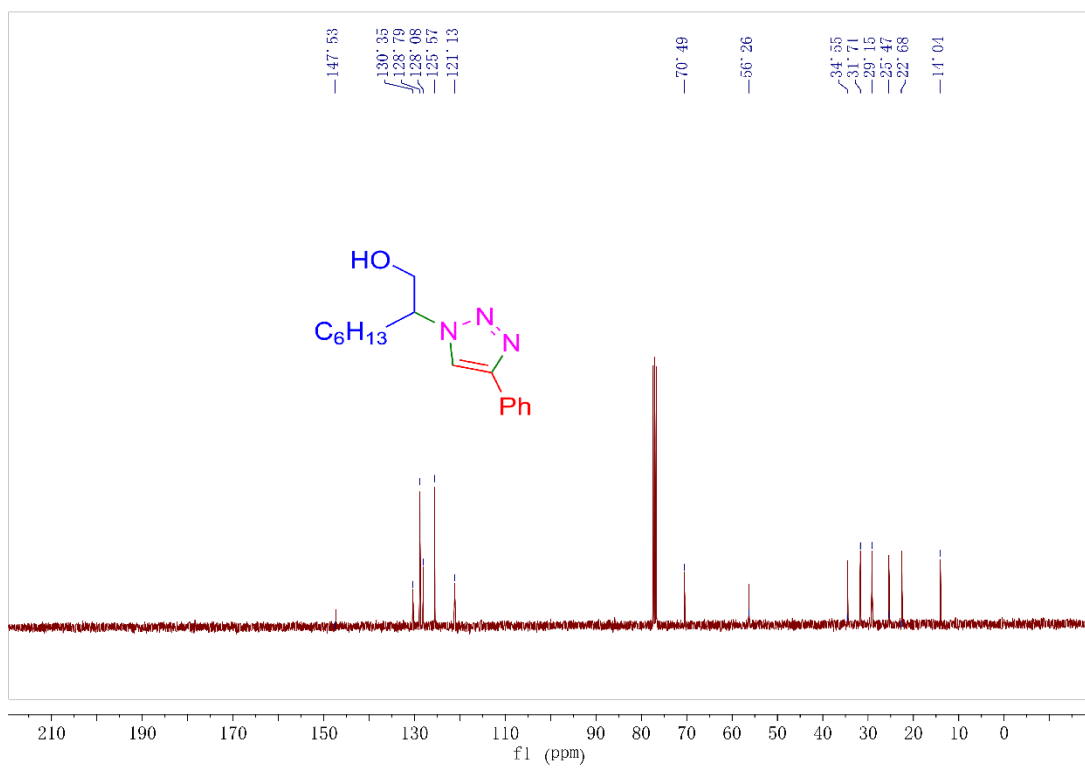

S7.  $^{13}\text{C}$  NMR of 4a.



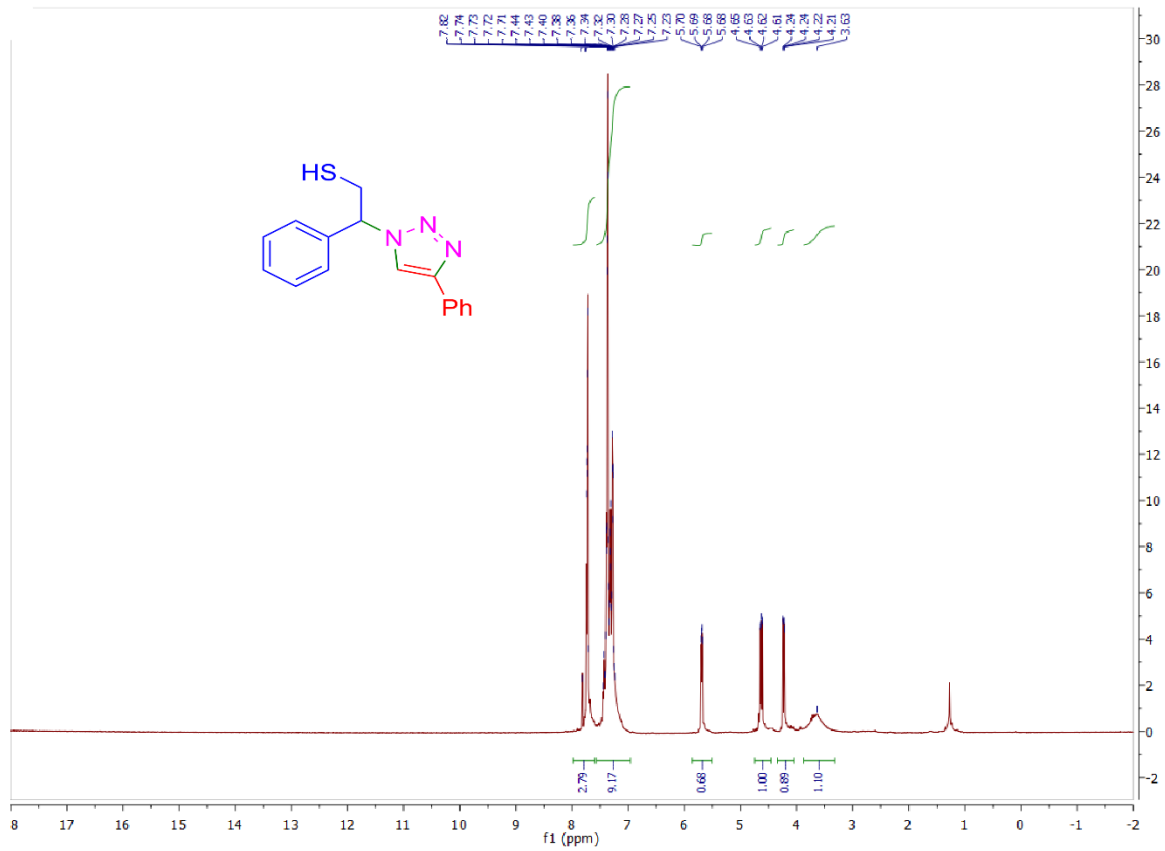

S8.  $^1\text{H}$  NMR of 5a.

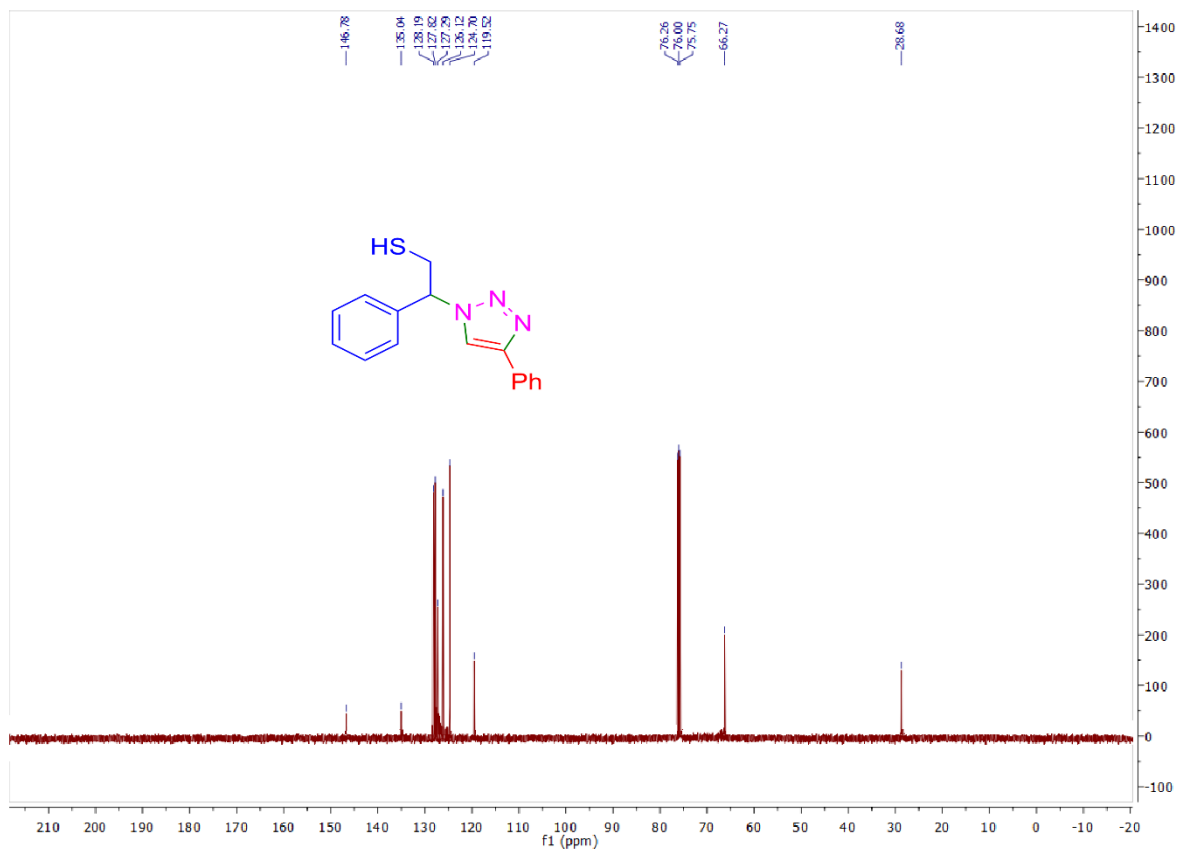

S8. <sup>13</sup>C NMR of 5a.

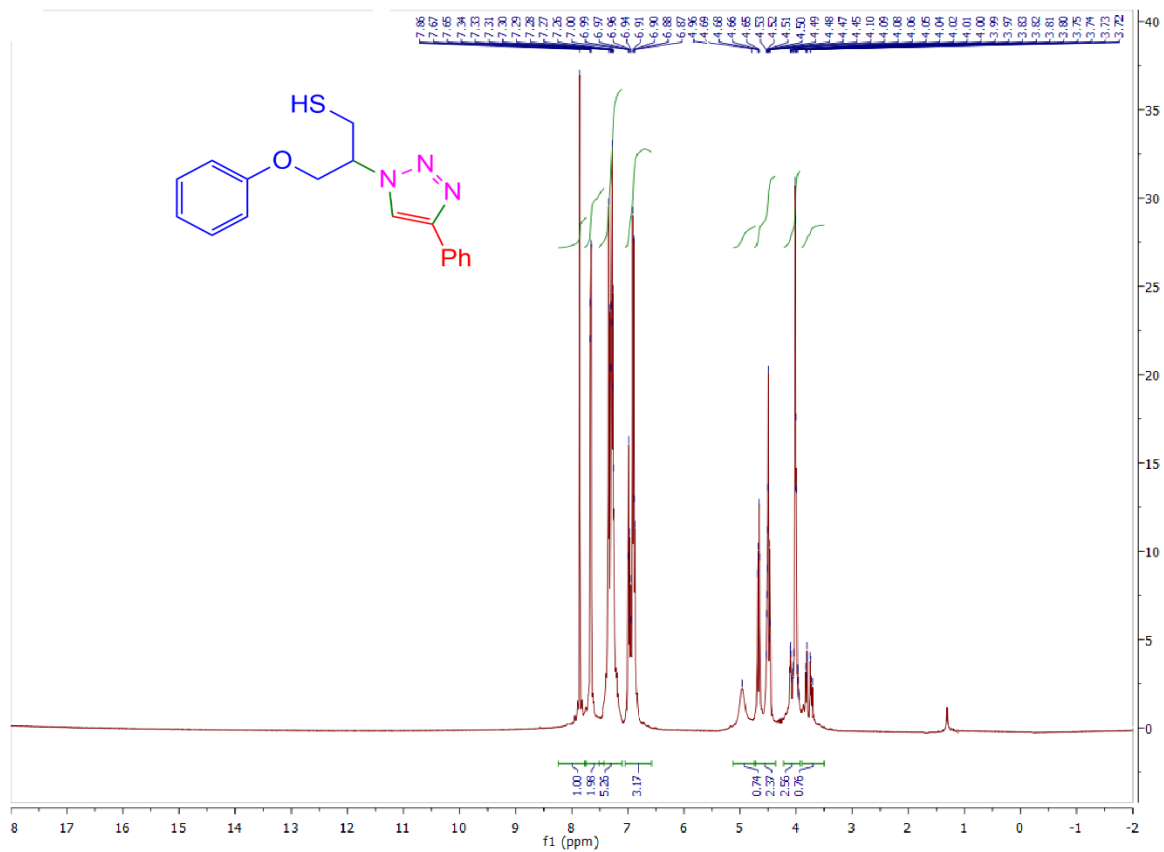

S9. <sup>1</sup>H NMR of 6a.



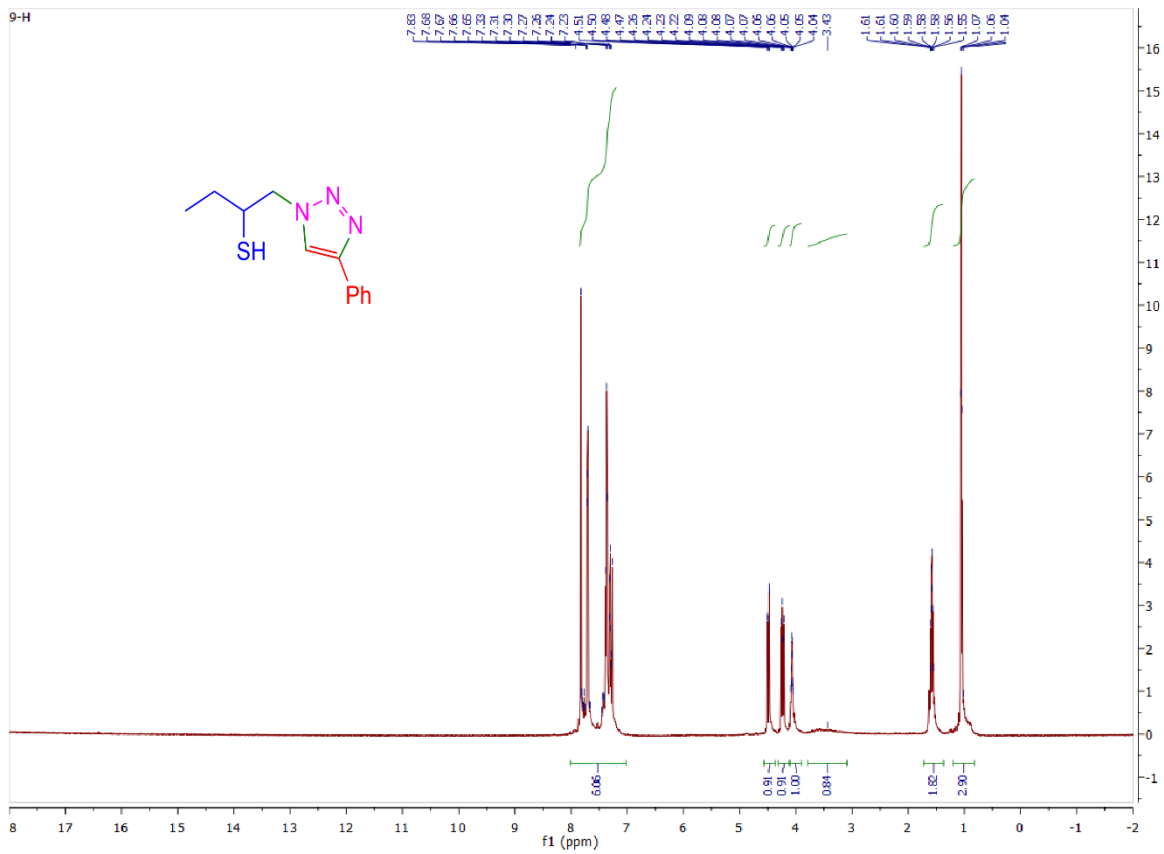

S11. <sup>1</sup>H NMR of 8a.

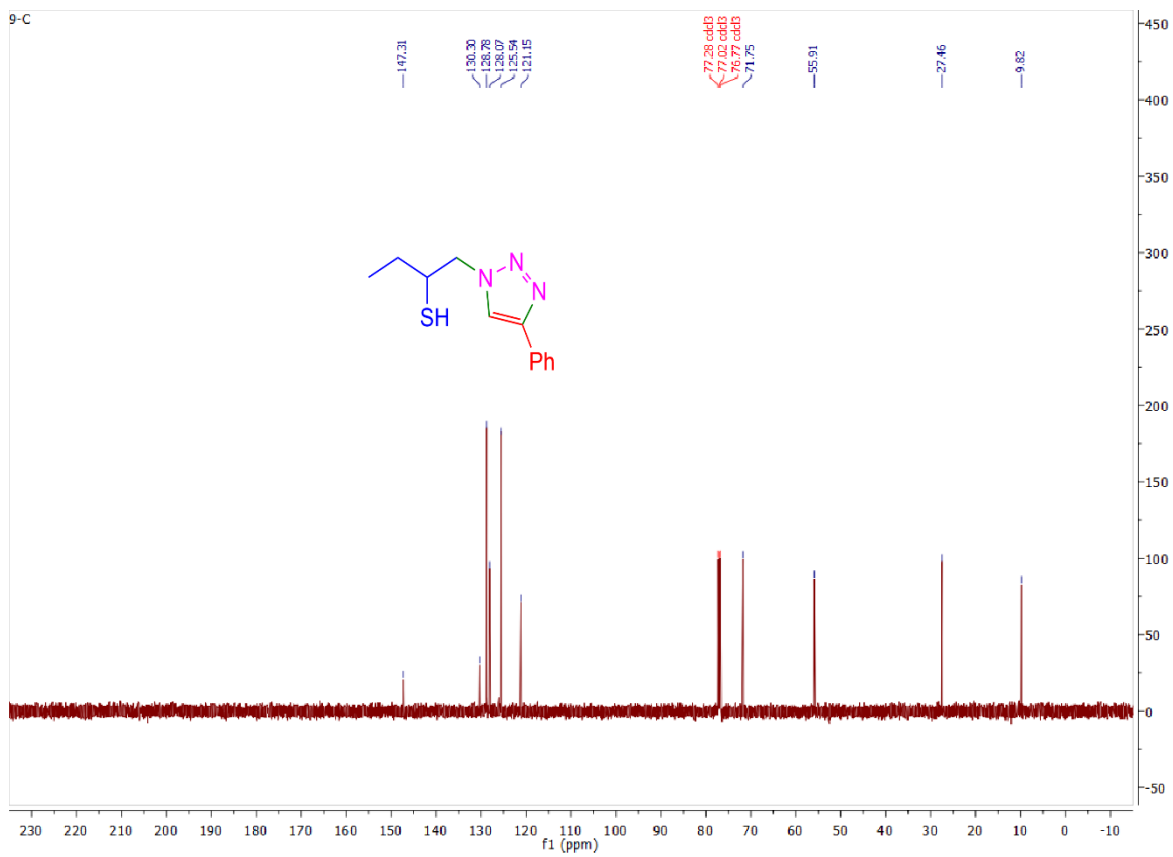

S12. <sup>13</sup>C NMR of 8a.

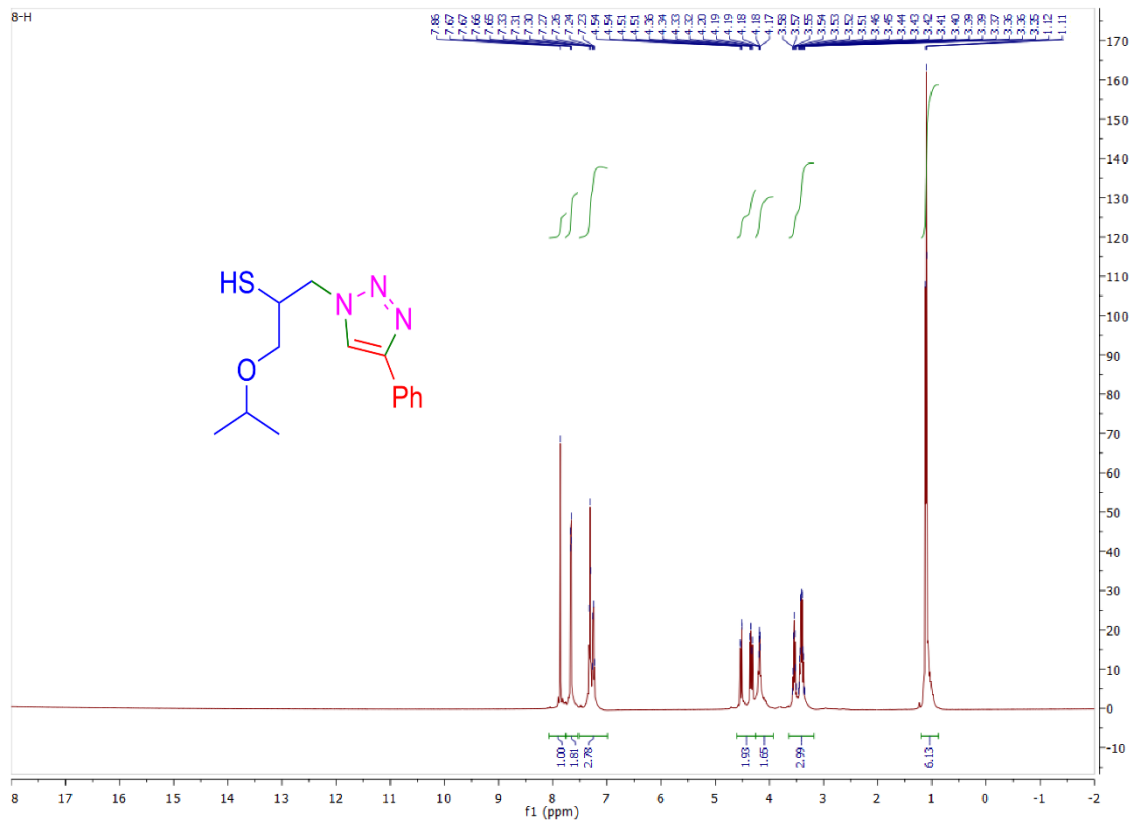

**S13.** <sup>1</sup>H NMR of 9a.

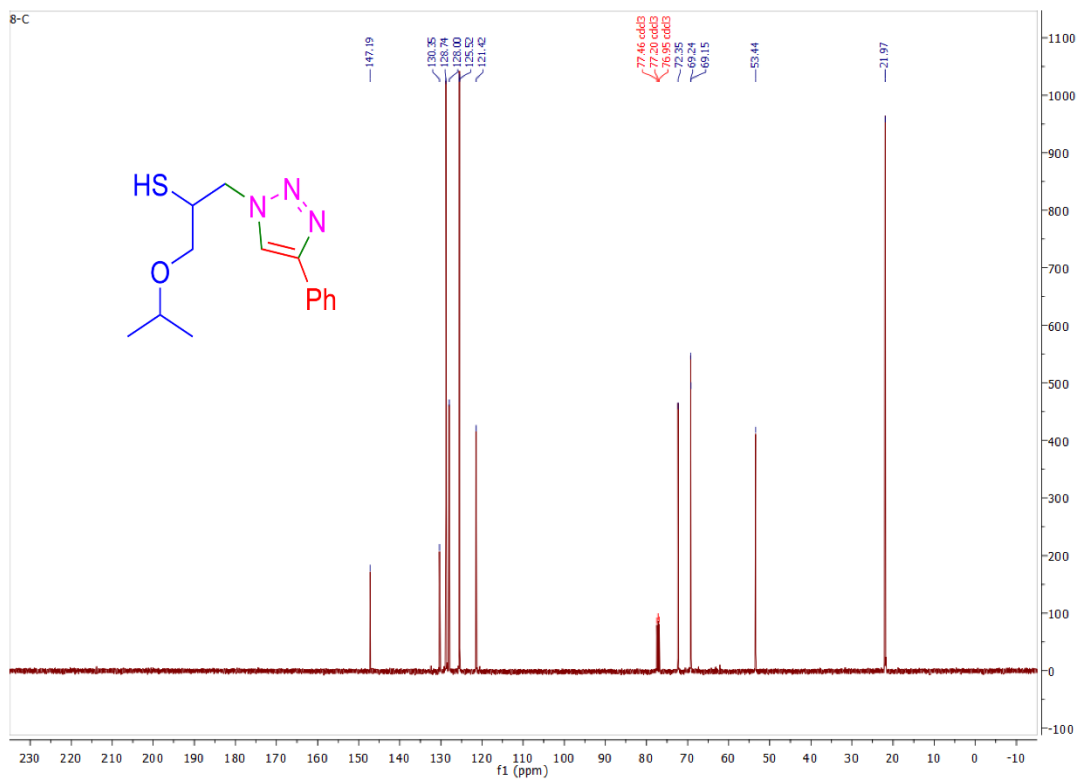

S14. <sup>13</sup>C NMR of 9a.



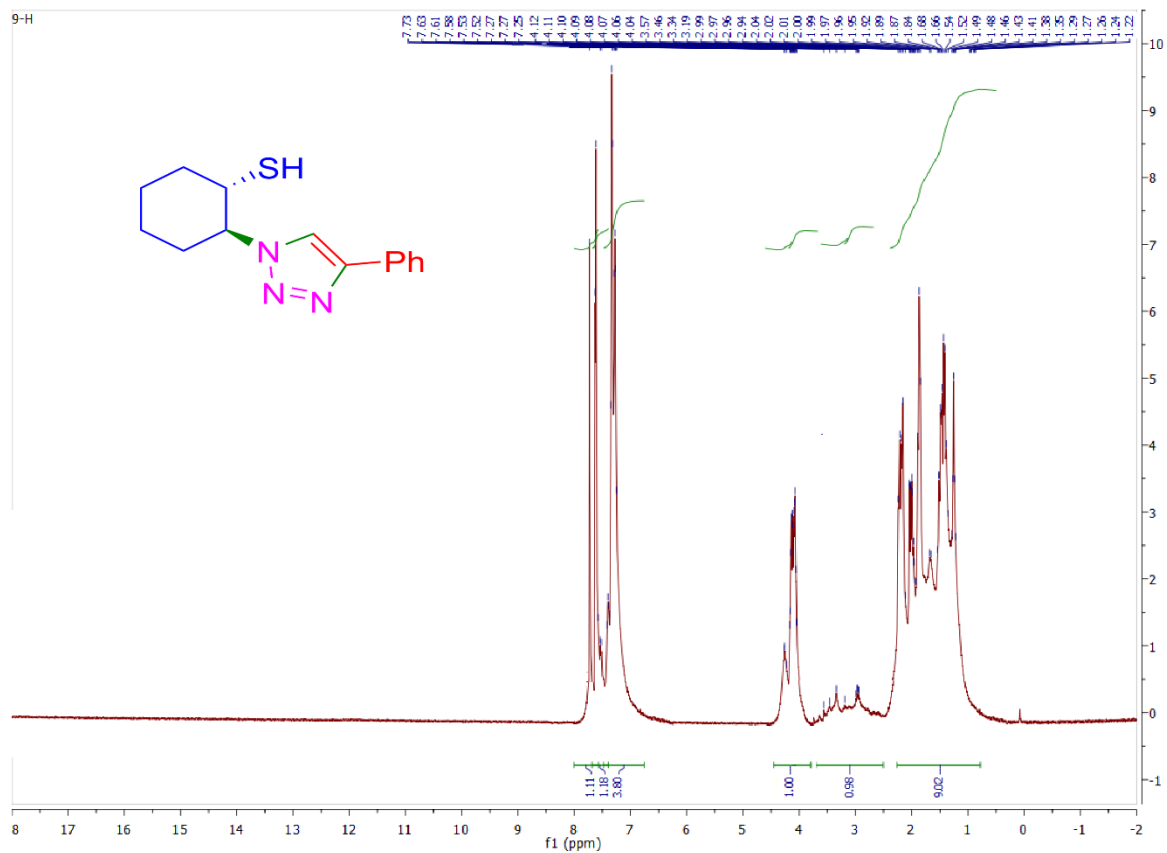

S15.  $^1\text{H}$  NMR of 10a.

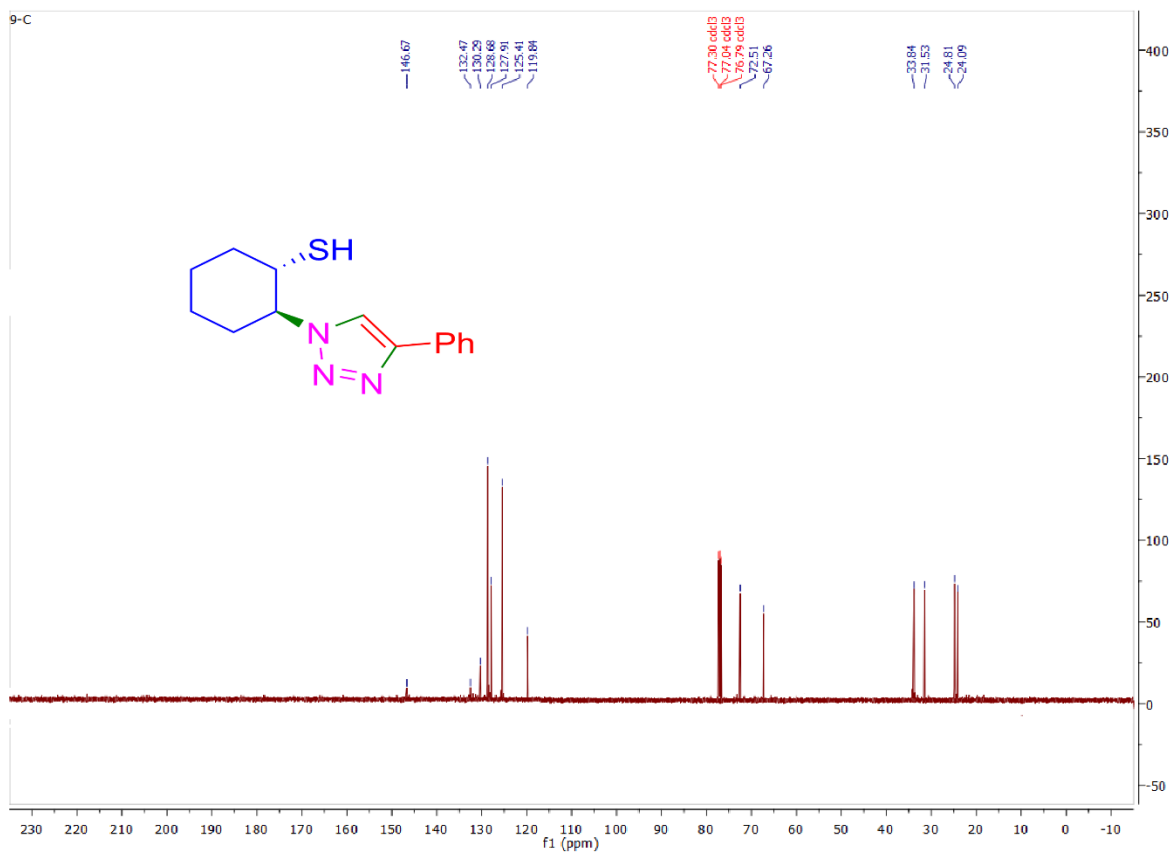

S16. <sup>13</sup>C NMR of 10a.

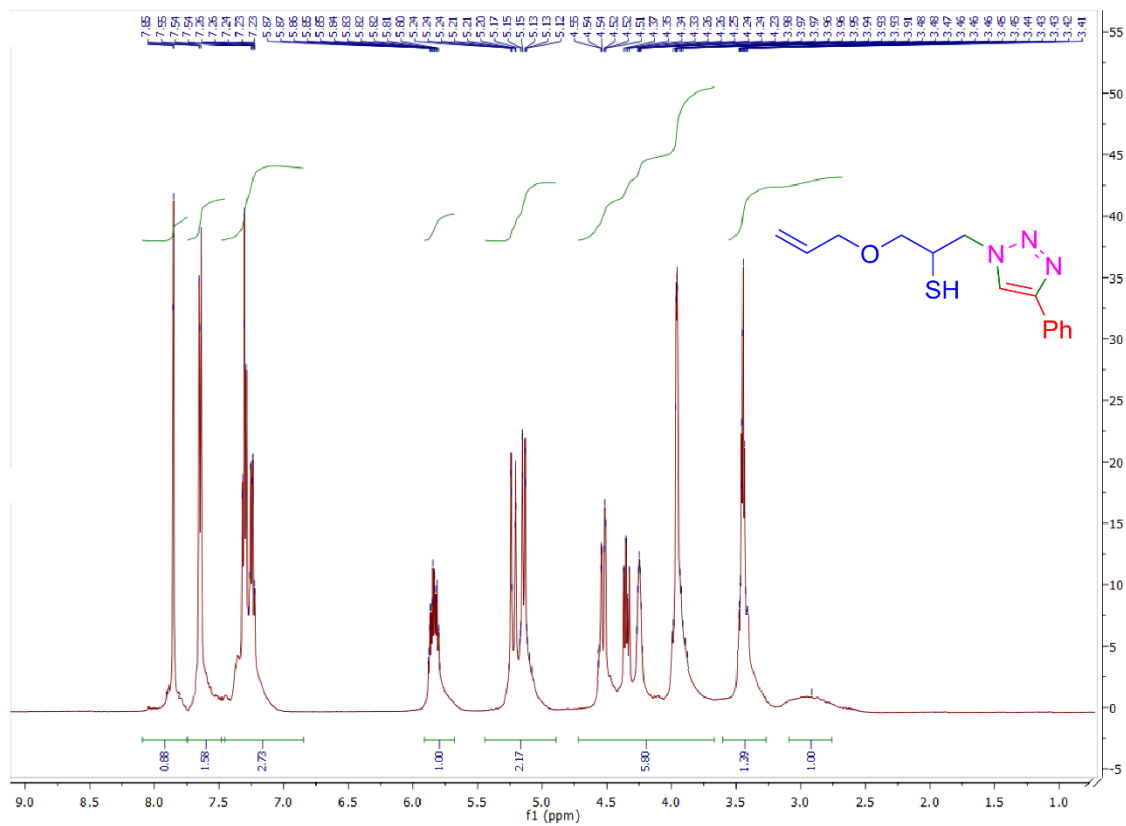

S17. <sup>1</sup>H NMR of 11a.

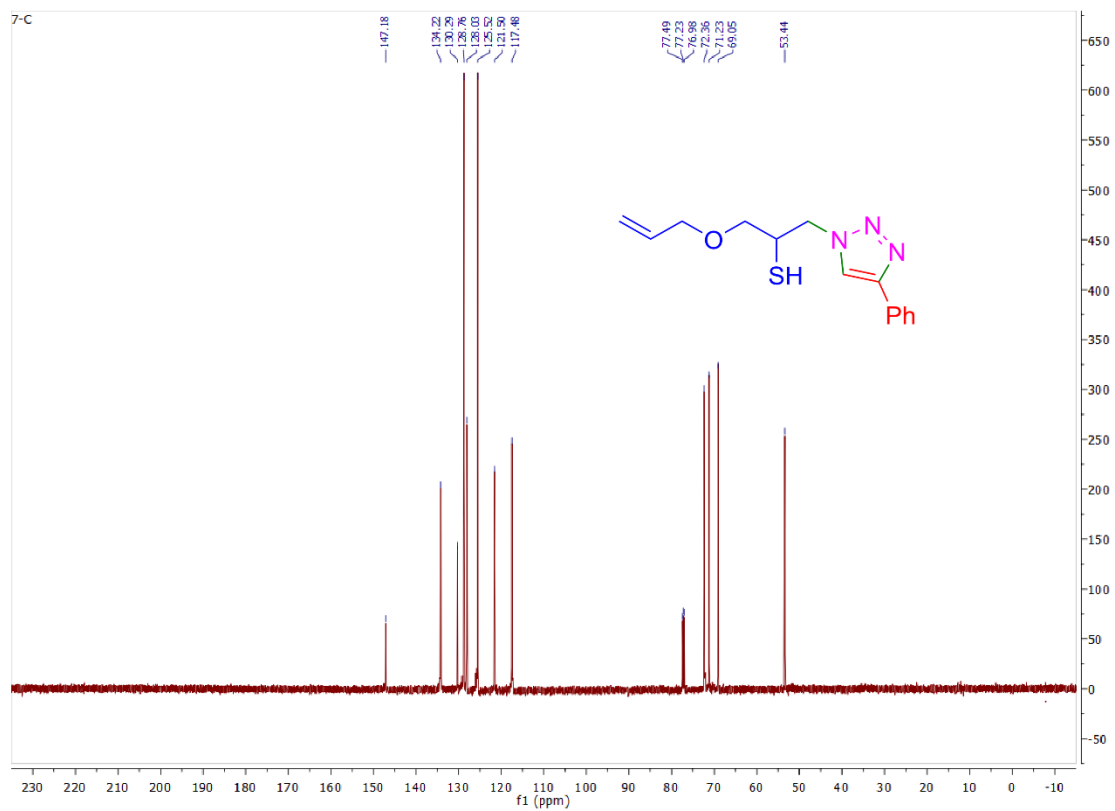

S18. <sup>13</sup>C NMR of 11a.

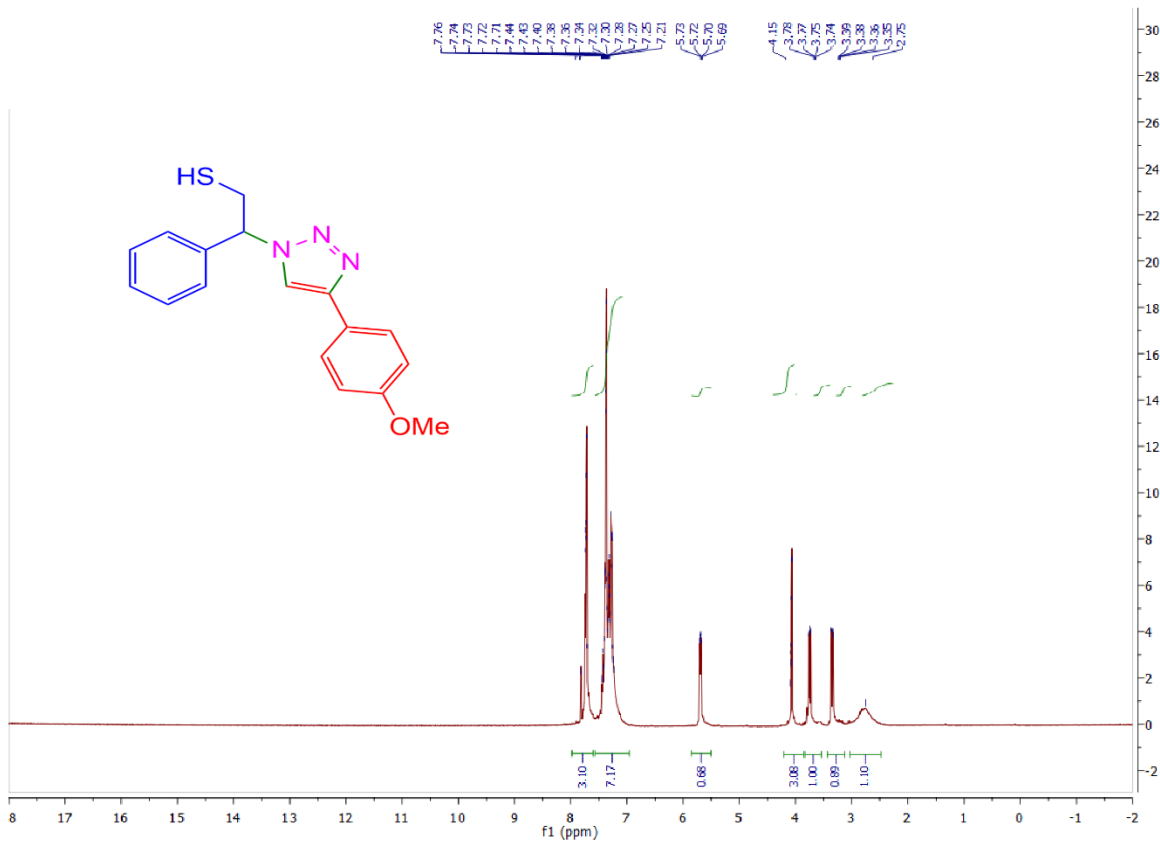

**S19.** <sup>1</sup>H NMR of 15a.

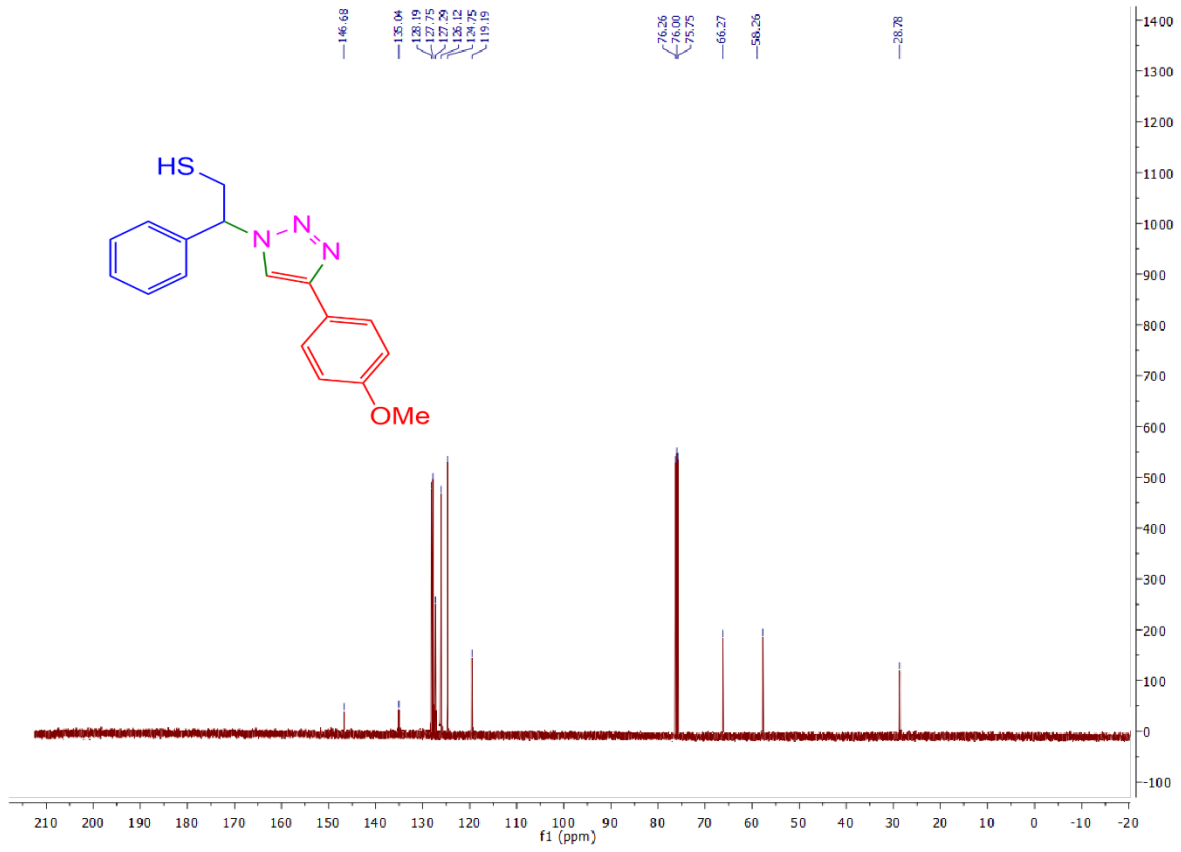

S20. <sup>13</sup>C NMR of 15a.
